# Supplementary material for: Sugar metabolism reprogramming in a non-climacteric bud mutant of a climacteric plum fruit during development on the tree
Source: PubMed Central journal article supplement (PMC5854140; doi:10.1093/jxb/erx391), 2017-11-25

# Sugar metabolism reprogramming in a non-climacteric bud mutant of a climacteric plum fruit

Macarena Farcuh<sup>1</sup>, Bosheng Li<sup>1</sup>, Rosa Rivero<sup>2</sup>, Avi Sadka<sup>3</sup>, Eduardo Blumwald<sup>1,\*</sup>

<sup>1</sup>Dept of Plant Sciences, University of California, Davis, CA 95616; <sup>2</sup>CEBAS, CSIC, Murcia, Spain, <sup>3</sup>Dept of Fruit Tree Sciences, Volcani Research Center, Bet Dagan, Israel.

## SUPPLEMENTARY DATA

### Sugar concentration quantification

**NMR Analyses:** The extraction of the metabolites was done in 50 mg of freeze-lyophilized plum fruit and leaf tissues using methanol:chloroform:water (2:2:1) followed by sonication for 1h. After centrifugation at 10,500 xg for 20 min at 4°C, the upper hydroalcoholic phase was carefully separated and dried under Speed-Vac for 24h. To evaluate the reproducibility of sample preparation, three portions of each sample were used to perform three extractions. For the <sup>1</sup>H-NMR quantification, the dry residue of the hydroalcoholic phase was dissolved in 0.75 mL of deuterium oxide phosphate buffer (150 mM, pH 7.0) measured by a glass BNC electrode (Sigma-Aldrich) containing 3 mM 4,4- Trimethyl-4-silyl propanoic acid (TSP) as an internal standard. All <sup>1</sup>H-NMR spectra were recorded at 298 °K on a Bruker AVIII HD 500 NMR spectrometer (500.13 MHz for <sup>1</sup>H) equipped with a 5 mm CPP BBO cryogenic probe (Bruker Biospin, Germany). <sup>1</sup>H spectra were referenced to TSP signal ( $\delta = 0.00$  ppm), whereas <sup>13</sup>C spectra were referenced to CH-<sup>1</sup> resonance of  $\alpha$ -D-glucose ( $\delta = 93.10$  ppm). A standard one-dimensional pulse sequence noesypr1d (recycle delay-90°-t1-90°-tm-90°-acquisition) was used to obtain metabolic profiles of plum fruit and leaf extracts with the 90° pulse length of about 11  $\mu$ s and t1 of 3  $\mu$ s. Water suppression was achieved with a weak irradiation during the recycle delay (RD = 2 s) and mixing time (100 ms). Sixty-four transients were collected into 32,768 data points for each spectrum with a spectral width of 8 kHz. An exponential window function with line-broadening factor of 0.5 Hz was applied to free induction decays prior to Fourier transformation (FT). For resonance assignment purposes, <sup>1</sup>H-<sup>1</sup>H-correlation spectroscopy (COSY; cosygpqfpr), <sup>1</sup>H-<sup>1</sup>H-total correlation spectroscopy (TOCSY; mlevphpr) and <sup>1</sup>H-<sup>13</sup>C-heteronuclear single quantum coherence (HSQC; hsqcetgp) two-dimensional NMR spectra was acquired for selected samples. In COSY and TOCSY experiments, 48 transients were collected

into 2,048 data points for each 256 increments with the spectral width of 12 ppm for both dimensions. Phase insensitive mode was used with gradient selection for the COSY experiments whereas the well-known MLEV-17 was employed as the spin-lock scheme in the phase sensitive. The TOCSY experiment (time-proportional phase incrementation) had a mixing time of 100 ms.  $^1\text{H}$ - $^{13}\text{C}$  HSQC NMR spectra were recorded using the gradient selected sequences with 200 transients and 2,048 data points for each of the 1,064 increments. The spectral widths were 6,313 Hz for  $^1\text{H}$  and 26,410 Hz for  $^{13}\text{C}$  for HSQC experiments. The data were Fourier transformed into a 4 x 2k matrix with appropriate apodization functions.  $^1\text{H}$  NMR spectra were manually corrected for phase and baseline distortions using TOPSPIN version 3.2 (Bruker Biospin) and the spectral region of  $\delta=0.5$  to 9.5 was uniformly integrated into 3,166 buckets with width of 0.003 ppm (1.8 Hz) using the Chenomx software version 3.8.3 (Bruker Biospin). The region  $\delta=4.67$  to 5.15 was discarded to eliminate the effects of imperfect water presaturation. The spectral areas of all buckets were normalized to the weight of extracts employed for measurements. The intensities of 60 selected  $^1\text{H}$  resonances due hydro-alcoholic metabolites were measured with respect to the intensity of TSP signal used as internal standard with a concentration of 3 mM.

***UHPLC-QTOF-MS/MS analyses:*** The chemical extraction was done in 50 mg of plum fruit and leaf lyophilized tissues using chloroform:methanol:water (1:2:2) followed by sonication of 1h. Samples were centrifuged at 18,000 xg during 5 min at 4°C. The supernatant was filtered through a 0.2  $\mu\text{m}$  Whatman syringe filter and these extracts were used for the UHPLC-QTOF-MS/MS analysis. Separation of sugars from plum extracts (fruits and leaves) was performed on a Waters Acquity iClass UHPLC (Waters Corporation, Milford, MA) consisting of a vacuum degasser, an auto-sampler and a binary pump. This instrument was equipped with a BEH Amide UHPLC column (2.1 x 100 mm, 1.7  $\mu\text{m}$ ) from Waters Corporation. Acidified water (0.1% formic acid, v/v) and Acetonitrile were used as mobile phases A and B, respectively. The gradient was programmed as follows: 0 min, 99% B; 7 min, 30% B; 7.1 min, 99% B; 10 min, 99% B; and finally, the initial conditions were held for 7 min as a re-equilibration step. The flow rate was set at 0.30 mL/min throughout the gradient. The injection volume was 5  $\mu\text{L}$  and the column temperature was maintained at 40 °C. The UHPLC system was coupled to a quadrupole-time-of-flight (maXis Impact HR Q-TOF-MS, Bruker Daltonik GmbH, Bremen, Germany) orthogonal accelerated Q-TOF mass spectrometer, equipped with an electrospray ionization source (ESI).

Parameters for analysis were set using negative and positive ion modes, with spectra acquired over a mass range from 50 to 1200 m/z. The optimum values of the ESI-MS parameters were: capillary voltage, -4.0 and +4.5 kV; drying gas temperature, 200 °C; drying gas flow, 8.0 L/ min; nebulizing gas pressure, 2 bars; collision RF, 150 Vpp; transfer time 72 μs, and pre-pulse storage, 5 μs. The MS data were processed through Data Analysis 4.0 software (Bruker Daltonics, Bremen, Germany) which provided a list of possible elemental formulas by using the Generate Molecular Formula™ editor. The editor uses a CHNO algorithm, which provides standard functionalities, such as maximum/minimum elemental range, and a sophisticated comparison of the theoretical with the measured isotope pattern (mSigma value), for increasing the confidence in the suggested molecular formula. The widely-accepted accuracy for confirmation of elemental compositions has been established as 5 ppm. At some stage in the UHPLC method development, an external apparatus calibration was performed using a KD Scientific syringe pump (Vernon Hills, IL) directly linked to the interface, passing a solution of sodium formate with a flow rate of 180 μL/h. Using this method, an exact calibration curve based on numerous cluster masses each differing by 68 Da (CHO<sub>2</sub>Na) was obtained. Due to the compensation of temperature drift in the Q-TOF, this external calibration provided accurate mass values for a complete run without the need for a dual sprayer set up for internal mass calibration.

**Table S1.** List of primers used in qRT-PCR.

| Gene name                  | <i>Prunus persica</i><br>gene ID | Description                                        | Primer<br>Orientation | Primer Sequence (5'-3')    |
|----------------------------|----------------------------------|----------------------------------------------------|-----------------------|----------------------------|
| <i>SPS</i>                 | ppa000622m.g                     | Sucrose Phosphate Synthase                         | Forward               | AACACTGCCGGACTTACTTGAC     |
|                            |                                  |                                                    | Reverse               | ACCCTTCAGCAGCCATTTTC       |
| <i>CWINV</i>               | ppa004218m.g                     | Cell Wall Invertase                                | Forward               | CAGGACCCTTTGGCTTGATAAG     |
|                            |                                  |                                                    | Reverse               | TCCCTTTAGTACTGCTTGGC       |
| <i>VINV</i>                | ppa002334m.g                     | Vacuolar Invertase                                 | Forward               | CCAGTGACAAGGGATTGGATAC     |
|                            |                                  |                                                    | Reverse               | AAGTCCCGAACGCATAGTAATC     |
| <i>CytINV</i>              | ppa002625m.g                     | Cytosolic Invertase                                | Forward               | GGGACATGAGTGGAAAGGTTATC    |
|                            |                                  |                                                    | Reverse               | GCAGCGGTAAACAACCAAAG       |
| <i>INVINH</i>              | ppa011699m.g                     | Invertase Inhibitor                                | Forward               | GCACCTTGTGGTATGGTGAGTATAAG |
|                            |                                  |                                                    | Reverse               | GAACCTCCCAACAGTGAAGAAG     |
| <i>SuSy</i>                | ppa017606m.g                     | Sucrose Synthase                                   | Forward               | AGTATCGGAACTTGGTGAAGAATG   |
|                            |                                  |                                                    | Reverse               | CTTGGTTTGGTCTGTGATTTGG     |
| <i>Tre</i>                 | ppa003514m.g                     | Trehalase                                          | Forward               | CGTCATCTCTCTGTCACCAATC     |
|                            |                                  |                                                    | Reverse               | ATGAGAATGAAGAGTGGCTATGG    |
| <i>GALK</i>                | ppa004568m.g                     | Galactokinase                                      | Forward               | TGGTACACAATCTGGTGGAAATG    |
|                            |                                  |                                                    | Reverse               | CGCACATCAGTAGCACGTATAG     |
| $\beta$ - <i>GAL</i>       | ppa002839m.g                     | Beta-Galactosidase                                 | Forward               | TGCAGCTACATTGGGACATTC      |
|                            |                                  |                                                    | Reverse               | CCTCAAACACTACCACCAGATT     |
| $\alpha$ - <i>GAL</i>      | ppa007136m.g                     | Alpha-Galactosidase                                | Forward               | TTGAAGCCAGTCTCGTAACC       |
|                            |                                  |                                                    | Reverse               | AACCATGAGCGTGACATTAGA      |
| <i>S6PDH</i>               | ppa009027m.g                     | Sorbitol-6- Phosphate-Dehydrogenase                | Forward               | TTTGATTGCGCTGCTGATTAC      |
|                            |                                  |                                                    | Reverse               | CTTGGTGGTGTGAAGAGATC       |
| <i>NAD<sup>+</sup>-SDH</i> | ppa007458m.g                     | NAD <sup>+</sup> -dependent Sorbitol Dehydrogenase | Forward               | CCCAGAAGGAGATTGAAGAAGC     |
|                            |                                  |                                                    | Reverse               | ACTTGTAGTAGCTCTCTCAACTTTAC |
| <i>GoIS</i>                | ppa008264m.g                     | Galactinol Synthase                                | Forward               | GGTGAAGAAATGGTGGGACATA     |
|                            |                                  |                                                    | Reverse               | CTTCTCTTGGTCCTGCTCTTG      |
| <i>RS</i>                  | ppa001841m.g                     | Raffinose Synthase                                 | Forward               | GCTGGGATTTGTGTTGAAGATG     |
|                            |                                  |                                                    | Reverse               | CAGAGGCTGGAGTAACAACAA      |
| <i>HK</i>                  | ppa004471m.g                     | Hexokinase                                         | Forward               | CCTCCATTGACTCTGGCATAAC     |
|                            |                                  |                                                    | Reverse               | CGCCTTTCCATAGCCTCATTCC     |
| <i>MON</i>                 | ppa003026m.g                     | SAND protein-related trafficking protein           | Forward               | GGGAACCTTATATTGGCGTAGG     |
|                            |                                  |                                                    | Reverse               | CTGCTGACGAGGACTACTTATTG    |

**Table S2.** A list of the sugar metabolism-associated genes from RNA-Seq analyses and their corresponding number of edges. Sugar metabolism-associated genes, obtained from the differentially expressed genes (DEGs) from RNA-Seq analysis (by GO terms and literature data), organized by module names as indicated in Fig. 4 are shown. Genes in bold type correspond to the 28 sugar metabolism-related genes significantly correlated with sugar contents through PCC analysis (Table 2). Number of edges were estimated using as a cutoff a Weighted Gene Co-expression Network Analysis (WGCNA) edge weight  $\geq 0.5$ , as indicated in “Materials and Methods”.

| Module name | <i>Prunus persica</i> gene IDs | Description of sugar-metabolism related genes              | Abbreviation of sugar-metabolism related genes         | Number of edges |
|-------------|--------------------------------|------------------------------------------------------------|--------------------------------------------------------|-----------------|
| blue        | <b>ppa002839m.g</b>            | <b>beta-galactosidase 16</b>                               | <b><math>\beta</math>-GAL, <math>\beta</math>GAL16</b> | <b>194</b>      |
| blue        | <b>ppa004568m.g</b>            | <b>Mevalonate/ galactokinase family protein</b>            | <b>GALK</b>                                            | <b>188</b>      |
| blue        | ppa001480m.g                   | beta-galactosidase 8                                       | $\beta$ -GAL8                                          | 88              |
| blue        | <b>ppa002625m.g</b>            | <b>cytosolic invertase</b>                                 | <b>CytINV, At-A/N-InvE</b>                             | <b>67</b>       |
| blue        | ppa004192m.g                   | Glucose-1-phosphate adenylyltransferase family protein     | APL3                                                   | 65              |
| blue        | ppa000820m.g                   | arabinose kinase                                           | ARA1,ATISA1,ISA1                                       | 60              |
| blue        | ppa000755m.g                   | Glycosyl hydrolase family 38 protein                       | empty                                                  | 58              |
| blue        | ppa006839m.g                   | Pectin lyase-like superfamily protein                      | empty                                                  | 56              |
| blue        | ppa006857m.g                   | Pectin lyase-like superfamily protein                      | empty                                                  | 50              |
| blue        | ppa001971m.g                   | cellulose synthase like G3                                 | AtCSLG3,CSLG3                                          | 50              |
| blue        | ppa003316m.g                   | Pyruvate kinase family protein                             | PKP-ALPHA,PKP1                                         | 48              |
| blue        | ppa008154m.g                   | UDP-XYL synthase 6                                         | UXS6                                                   | 45              |
| blue        | ppa022137m.g                   | Galactosyltransferase family protein                       | empty                                                  | 45              |
| blue        | ppa009245m.g                   | xyloglucan endotransglucosylase/hydrolase 8                | XTH8                                                   | 45              |
| blue        | ppa004653m.g                   | cellulase 2                                                | ATCEL2,CEL2                                            | 44              |
| blue        | ppa015545m.g                   | glucose-6-phosphate dehydrogenase 2                        | G6PD2                                                  | 42              |
| blue        | <b>ppa001535m.g</b>            | <b>sucrose synthase 4</b>                                  | <b>SuSy, AtSUS4</b>                                    | <b>40</b>       |
| blue        | ppa000827m.g                   | Glycosyl transferase, family 35                            | empty                                                  | 39              |
| blue        | ppa006008m.g                   | pyruvate dehydrogenase E1 alpha                            | PDH-E1 ALPHA                                           | 33              |
| blue        | ppa005162m.g                   | UDP-glucosyl transferase 78D2                              | UGT78D2                                                | 25              |
| blue        | ppa002857m.g                   | Di-glucose binding protein with Leucine-rich repeat domain | empty                                                  | 25              |
| blue        | ppa001276m.g                   | stachyose synthase                                         | AtSTS,STS                                              | 25              |
| blue        | ppa002254m.g                   | Cellulose-synthase-like C5                                 | AtCSLC05,AtCSLC5                                       | 24              |
| blue        | ppa012287m.g                   | cell wall / vacuolar inhibitor of fructosidase 1           | AtC/VIF1                                               | 23              |
| blue        | ppa009023m.g                   | myo-inositol oxygenase 1                                   | MIOX1                                                  | 22              |
| blue        | ppa001573m.g                   | sucrose synthase 2                                         | AtSUS2,SSA,SUS2                                        | 21              |

|             |                     |                                                                  |                      |            |
|-------------|---------------------|------------------------------------------------------------------|----------------------|------------|
| blue        | <b>ppa006549m.g</b> | <b>Glucose-6-phosphate/phosphate translocator-related</b>        | <b>APE2,TPT</b>      | <b>19</b>  |
| blue        | ppa001334m.g        | beta-galactosidase 3                                             | β-GAL3               | 18         |
| blue        | ppa006179m.g        | alpha-galactosidase 1                                            | AGAL1,AtAGAL1        | 18         |
| blue        | ppa002894m.g        | Glycosyl hydrolase family protein                                | empty                | 17         |
| blue        | ppa011478m.g        | Plant invertase inhibitor superfamily                            | INVINH               | 16         |
| blue        | ppa015127m.g        | UDP-glucosyl transferase 88A1                                    | UGT88A1              | 15         |
| blue        | ppa004313m.g        | inositol 1,3,4-trisphosphate 5/6-kinase 4                        | AtITPK4,ITPK4        | 14         |
| blue        | ppa001232m.g        | Glycosyl hydrolases family 31 protein                            | empty                | 11         |
| blue        | <b>ppa004783m.g</b> | <b>O-Glycosyl hydrolases family 17 protein</b>                   | <b>empty</b>         | <b>11</b>  |
| blue        | <b>ppa005180m.g</b> | <b>UDP-Glycosyltransferase superfamily protein</b>               | <b>empty</b>         | <b>10</b>  |
| blue        | ppa008811m.g        | UDP-Glycosyltransferase superfamily protein                      | empty                | 8          |
| blue        | ppb025297m.g        | UDP-glucosyl transferase 88A1                                    | UGT88A1              | 8          |
| blue        | ppa005520m.g        | UDP-Glycosyltransferase superfamily protein                      | empty                | 6          |
| blue        | ppa009865m.g        | phosphoenolpyruvate carboxylase kinase 1                         | AtPPCK1,PPCK1        | 5          |
| blue        | ppa006392m.g        | Pectin lyase-like superfamily protein                            | empty                | 4          |
| blue        | ppa001932m.g        | tonoplast monosaccharide transporter2                            | TMT2                 | 2          |
| blue        | ppa005761m.g        | Pectin lyase-like superfamily protein                            | empty                | 2          |
| blue        | ppa006411m.g        | Glucose-6-phosphate/phosphate translocator-related               | ARAPPT,CUE1,PPT      | 1          |
| darkorange2 | <b>ppa007136m.g</b> | <b>alpha-galactosidase 2</b>                                     | <b>α-GAL, α-GAL2</b> | <b>136</b> |
| darkorange2 | <b>ppa008264m.g</b> | <b>galactinol synthase 4</b>                                     | <b>GoIS, AtGoIS4</b> | <b>111</b> |
| darkorange2 | ppa005045m.g        | UDP-glucose 6-dehydrogenase family protein                       | empty                | 110        |
| darkorange2 | ppa003984m.g        | O-Glycosyl hydrolases family 17 protein                          | empty                | 108        |
| darkorange2 | ppa006626m.g        | Galactosyltransferase family protein                             | empty                | 106        |
| darkorange2 | ppa006836m.g        | sedoheptulose-bisphosphatase                                     | SBPASE               | 105        |
| darkorange2 | ppa004996m.g        | Pectin lyase-like superfamily protein                            | empty                | 97         |
| darkorange2 | ppa005818m.g        | Pectin lyase-like superfamily protein                            | empty                | 96         |
| darkorange2 | ppa009350m.g        | xyloglucan endotransglucosylase/hydrolase 9                      | XTH9                 | 95         |
| darkorange2 | ppa008964m.g        | Galactose mutarotase-like superfamily protein                    | empty                | 93         |
| darkorange2 | ppa023537m.g        | alpha-L-fucosidase 1                                             | AtFUC1,FUC1          | 91         |
| darkorange2 | ppa014982m.g        | Pectin lyase-like superfamily protein                            | empty                | 91         |
| darkorange2 | ppa002271m.g        | beta-galactosidase 3                                             | β-GAL3               | 89         |
| darkorange2 | ppa006961m.g        | Glycosyltransferase family 29 (sialyltransferase) family protein | empty                | 85         |
| darkorange2 | ppa025914m.g        | Glycosyl hydrolase family protein                                | empty                | 82         |
| darkorange2 | ppa009090m.g        | xyloglucan:xyloglucosyl transferase 33                           | "XET,XTH33"          | 82         |
| darkorange2 | ppa006239m.g        | Glycosyl hydrolase superfamily protein                           | empty                | 82         |

|             |                     |                                                       |                             |           |
|-------------|---------------------|-------------------------------------------------------|-----------------------------|-----------|
| darkorange2 | ppa001675m.g        | Glycosyl hydrolase family protein                     | empty                       | 75        |
| darkorange2 | ppb008505m.g        | Pectin lyase-like superfamily protein                 | empty                       | 68        |
| darkorange2 | ppa002417m.g        | rhamnose biosynthesis 1                               | AtRHM1,RHM1,ROL1            | 59        |
| darkorange2 | ppa004644m.g        | glycosyl hydrolase 9B1                                | AtGH9B1,CEL1,GH9B1          | 58        |
| darkorange2 | ppa001718m.g        | beta-xylosidase 1                                     | AtBXL1,BXL1                 | 57        |
| darkorange2 | ppa000567m.g        | cellulose synthase 6                                  | CESA6,E112,IXR2,PRC1        | 56        |
| darkorange2 | ppa008032m.g        | UDP-D-glucose/UDP-D-galactose 4-epimerase 5           | UGE5                        | 56        |
| darkorange2 | ppa004814m.g        | O-Glycosyl hydrolases family 17 protein               | empty                       | 52        |
| darkorange2 | ppa007618m.g        | Glucose-1-phosphate adenyltransferase family protein  | CYT1,EMB101,GMP1,SOZ1 ,VTC1 | 48        |
| darkorange2 | ppa001098m.g        | Glycosyl hydrolases family 31 protein                 | empty                       | 42        |
| darkorange2 | ppa005337m.g        | alpha-L-fucosidase 1                                  | AtFUC1,FUC1                 | 35        |
| darkorange2 | ppa002424m.g        | phosphoenolpyruvate carboxykinase 1                   | PCK1,PEPCK                  | 29        |
| darkorange2 | ppa000636m.g        | sucrose phosphate synthase 1F                         | AtSPS1F,SPS1F               | 28        |
| darkorange2 | ppa003430m.g        | O-fucosyltransferase family protein                   | empty                       | 25        |
| darkorange2 | ppa026880m.g        | alpha-mannosidase 1                                   | MNS1                        | 22        |
| darkorange2 | ppa000557m.g        | cellulose synthase 6                                  | CESA6,E112,IXR2,PRC1        | 21        |
| darkorange2 | ppa022545m.g        | Nucleotide-diphospho-sugar transferase family protein | empty                       | 20        |
| darkorange2 | <b>ppa006167m.g</b> | <b>beta glucosidase 11</b>                            | <b>β-GLU11</b>              | <b>19</b> |
| darkorange2 | ppa026425m.g        | UDP-Glycosyltransferase superfamily protein           | empty                       | 19        |
| darkorange2 | ppa012444m.g        | Plant invertase inhibitor superfamily                 | INVINH                      | 18        |
| darkorange2 | ppa004126m.g        | Galactose oxidase/kelch repeat superfamily protein    | empty                       | 18        |
| darkorange2 | ppa005688m.g        | sugar transporter protein 7                           | STP7                        | 18        |
| darkorange2 | ppa004226m.g        | beta glucosidase 13                                   | β-GLU13                     | 18        |
| darkorange2 | ppa004921m.g        | O-fucosyltransferase family protein                   | empty                       | 17        |
| darkorange2 | ppa003047m.g        | Plant invertase inhibitor superfamily                 | INVINH                      | 14        |
| darkorange2 | ppa016442m.g        | beta glucosidase 11                                   | β-GLU11                     | 13        |
| darkorange2 | ppa005052m.g        | UDP-glucosyl transferase 71B6                         | UGT71B6                     | 12        |
| darkorange2 | ppa003417m.g        | inositol transporter 4                                | AtINT4,INT4                 | 12        |
| darkorange2 | ppa006056m.g        | Galactose oxidase/kelch repeat superfamily protein    | empty                       | 11        |
| darkorange2 | ppa1027206m.g       | O-Glycosyl hydrolases family 17 protein               | empty                       | 10        |
| darkorange2 | ppa002059m.g        | UDP-Glycosyltransferase superfamily protein           | empty                       | 10        |
| darkorange2 | ppa008326m.g        | UDP-Glycosyltransferase superfamily protein           | GT72B1,UGT72B1              | 9         |
| darkorange2 | ppa006158m.g        | FASCICLIN-like arabinogalactan protein 8              | FLA8                        | 8         |
| darkorange2 | ppa015738m.g        | UDP-Glycosyltransferase superfamily protein           | empty                       | 8         |
| darkorange2 | ppa009846m.g        | phosphoenolpyruvate carboxylase kinase 1              | AtPPCK1,PPCK1               | 7         |

|             |                     |                                                          |                        |           |
|-------------|---------------------|----------------------------------------------------------|------------------------|-----------|
| darkorange2 | ppa003622m.g        | O-fucosyltransferase family protein                      | empty                  | 7         |
| darkorange2 | ppa004485m.g        | ADP-glucose pyrophosphorylase family protein             | empty                  | 7         |
| darkorange2 | <b>ppa020483m.g</b> | <b>UDP-glucosyl transferase 76E2</b>                     | <b>UGT76E2</b>         | <b>6</b>  |
| darkorange2 | ppa000102m.g        | phosphatidylinositol-4-phosphate 5-kinase family protein | FAB1B                  | 6         |
| darkorange2 | ppa004344m.g        | sugar transporter 14                                     | AtSTP14,STP14          | 2         |
| darkorange2 | ppa026075m.g        | Carbohydrate-binding X8 domain superfamily protein       | empty                  | 1         |
| darkred     | <b>ppa003514m.g</b> | <b>trehalase 1</b>                                       | <b>TRE, AtTRE1</b>     | <b>58</b> |
| darkred     | <b>ppa000622m.g</b> | <b>sucrose phosphate synthase</b>                        | <b>SPS, AtSPS</b>      | <b>34</b> |
| darkred     | ppa007088m.g        | Glycosyl hydrolase superfamily protein                   | empty                  | 33        |
| darkred     | ppa007195m.g        | beta glucosidase 41                                      | $\beta$ -GLU41         | 32        |
| darkred     | ppa006613m.g        | Nucleotide-sugar transporter family protein              | empty                  | 32        |
| darkred     | ppa005334m.g        | UDP-Glycosyltransferase superfamily protein              | empty                  | 31        |
| darkred     | ppa005623m.g        | UDP-glucosyl transferase 76E2                            | UGT76E2                | 31        |
| darkred     | ppa022021m.g        | Rhamnogalacturonate lyase family protein                 | empty                  | 30        |
| darkred     | ppa009170m.g        | Galactose mutarotase-like superfamily protein            | empty                  | 29        |
| darkred     | ppa002453m.g        | rhamnose biosynthesis 1                                  | AtRHM1,RHM1,ROL1       | 29        |
| darkred     | ppa004981m.g        | UDP-glucose 6-dehydrogenase family protein               | empty                  | 28        |
| darkred     | ppa004430m.g        | myo-inositol-1-phosphate synthase 2                      | AtIPS2,ATMIPS2,MIPS2   | 28        |
| darkred     | ppa004829m.g        | UDP-Glycosyltransferase superfamily protein              | empty                  | 28        |
| darkred     | ppa003690m.g        | fructokinase-like 2                                      | FLN2                   | 28        |
| darkred     | ppa001281m.g        | UDP-glucose pyrophosphorylase 3                          | UGP3                   | 28        |
| darkred     | ppa003185m.g        | Mannose-binding lectin superfamily protein               | empty                  | 28        |
| darkred     | ppa002418m.g        | galacturonosyltransferase 1                              | GAUT1,LGT1             | 27        |
| darkred     | ppa004816m.g        | UDP-Glycosyltransferase superfamily protein              | empty                  | 27        |
| darkred     | ppa004703m.g        | Pyruvate kinase family protein                           | empty                  | 26        |
| darkred     | ppa005015m.g        | Pectin lyase-like superfamily protein                    | empty                  | 26        |
| darkred     | ppa006746m.g        | fructose-bisphosphate aldolase 2                         | FBA2                   | 25        |
| darkred     | ppa005736m.g        | mannose-1-phosphate guanylyltransferase (GDP)s           | VTC2                   | 25        |
| darkred     | ppa002955m.g        | UDP-Glycosyltransferase superfamily protein              | empty                  | 24        |
| darkred     | ppa004909m.g        | UDP-glucosyl transferase 85A2                            | AtUGT85A2,UGT85A2      | 24        |
| darkred     | ppa015619m.g        | beta glucosidase 40                                      | $\beta$ -GLU40         | 22        |
| darkred     | ppa009863m.g        | xyloglucan endotransglucosylase/hydrolase 16             | XTH16                  | 21        |
| darkred     | ppa002446m.g        | Deoxyxylulose-5-phosphate synthase                       | CLA,CLA1,DEF,DXPS2,DXS | 21        |
| darkred     | ppa003382m.g        | Pyruvate kinase family protein                           | PKP-ALPHA,PKP1         | 19        |
| darkred     | ppa007943m.g        | xyloglucan endotransglucosylase/hydrolase 32             | XTH32                  | 19        |



|         |                     |                                                                |                            |           |
|---------|---------------------|----------------------------------------------------------------|----------------------------|-----------|
| darkred | ppa006911m.g        | glucosyl transferase family 8                                  | GATL9,LGT8                 | 18        |
| darkred | ppa017816m.g        | beta-glucosidase 47                                            | $\beta$ -GLU47             | 18        |
| darkred | ppa003424m.g        | O-fucosyltransferase family protein                            | empty                      | 18        |
| darkred | ppa003986m.g        | phosphofructokinase 4                                          | PFK4                       | 17        |
| darkred | ppa001941m.g        | cellulose synthase like E1                                     | AtCSLE1,CSLE1              | 17        |
| darkred | ppa006572m.g        | Galactose oxidase/kelch repeat superfamily protein             | empty                      | 17        |
| darkred | <b>ppa008438m.g</b> | <b>UDP-galactose transporter 3</b>                             | <b>AtUTR3,UTR3</b>         | <b>17</b> |
| darkred | ppa004989m.g        | UDP-glucosyl transferase 85A3                                  | AtUGT85A3,UGT85A3          | 17        |
| darkred | ppa008275m.g        | xyloglucan endotransglucosylase/hydrolase 28                   | AtXTH28,EXGT-A2,XTH28,XTR2 | 16        |
| darkred | ppa007744m.g        | Aldolase superfamily protein                                   | empty                      | 16        |
| darkred | ppa009472m.g        | xyloglucan endotransglucosylase/hydrolase 6                    | XTH6                       | 15        |
| darkred | <b>ppa005599m.g</b> | <b>Pectin lyase-like superfamily protein</b>                   | <b>empty</b>               | <b>15</b> |
| darkred | ppa009608m.g        | xyloglucan endotransglucosylase/hydrolase 16                   | XTH16                      | 15        |
| darkred | ppa006160m.g        | alpha-amylase-like                                             | AMY1,ATAMY1                | 14        |
| darkred | ppa004655m.g        | Glycosyltransferase family 61 protein                          | empty                      | 14        |
| darkred | ppa002626m.g        | O-fucosyltransferase family protein                            | empty                      | 14        |
| darkred | ppa009792m.g        | xyloglucan endotransglucosylase/hydrolase 15                   | XTH15,XTR7                 | 13        |
| darkred | ppa016365m.g        | UDP-Glycosyltransferase superfamily protein                    | empty                      | 13        |
| darkred | ppa004972m.g        | UDP-glucosyl transferase 73B3                                  | UGT73B3                    | 12        |
| darkred | ppa001556m.g        | UDP-Glycosyltransferase / trehalose-phosphatase family protein | AtTPS6,TPS6                | 12        |
| darkred | ppa002372m.g        | alpha-L-arabinofuranosidase 1                                  | ARAF,ARAF1,ASD1            | 11        |
| darkred | ppa007996m.g        | Galactose oxidase/kelch repeat superfamily protein             | empty                      | 11        |
| darkred | ppa000473m.g        | cellulose synthase-like D3                                     | AtCSLD3,CSLD3              | 10        |
| darkred | ppa004033m.g        | sucrose-proton symporter 2                                     | AtSUC2,SUC2,SUT1           | 10        |
| darkred | ppa003178m.g        | Galactose-binding protein                                      | empty                      | 10        |
| darkred | ppa005415m.g        | Galactose oxidase/kelch repeat superfamily protein             | empty                      | 10        |
| darkred | ppa007794m.g        | galacturonosyltransferase-like 3                               | GATL3                      | 9         |
| darkred | ppa005598m.g        | glyceraldehyde-3-phosphate dehydrogenase B subunit             | GAPB                       | 9         |
| darkred | ppa024989m.g        | UDP-Glycosyltransferase superfamily protein                    | empty                      | 9         |
| darkred | ppa021513m.g        | Glycosyl hydrolase family 38 protein                           | empty                      | 9         |
| darkred | ppa004150m.g        | O-fucosyltransferase family protein                            | empty                      | 8         |
| darkred | ppa006859m.g        | sedoheptulose-bisphosphatase                                   | SBPASE                     | 8         |
| darkred | ppa1027170m.g       | Arabinanase/levansucrase/invertase                             | empty                      | 7         |
| darkred | ppa020981m.g        | 1-deoxy-D-xylulose 5-phosphate reductoisomerase                | DXR,PDE129                 | 6         |
| darkred | ppa005572m.g        | UDP-glucosyl transferase 73B3                                  | UGT73B3                    | 6         |

|            |                     |                                                             |                                           |           |
|------------|---------------------|-------------------------------------------------------------|-------------------------------------------|-----------|
| darkred    | ppa006402m.g        | alpha-amylase-like 2                                        | AMY2,AtAMY2                               | 6         |
| darkred    | ppa014706m.g        | Di-glucose binding protein with Kinesin motor domain        | empty                                     | 6         |
| darkred    | ppa005160m.g        | O-Glycosyl hydrolases family 17 protein                     | empty                                     | 5         |
| darkred    | ppa005856m.g        | Galactose oxidase/kelch repeat superfamily protein          | empty                                     | 5         |
| darkred    | ppa004320m.g        | O-Glycosyl hydrolases family 17 protein                     | empty                                     | 4         |
| darkred    | ppa026228m.g        | glycosyl hydrolase 9A1                                      | AtGH9A1,DEC,GH9A1,IRX2,KOR,KOR1,RSW2,TSD1 | 4         |
| darkred    | ppa000493m.g        | cellulose synthase-like D3                                  | AtCSLD3,CSLD3,KJK                         | 4         |
| darkred    | ppa020358m.g        | UDP-Glycosyltransferase superfamily protein                 | empty                                     | 4         |
| darkred    | ppa014010m.g        | arabinogalactan protein 16                                  | AGP16,AtAGP16                             | 3         |
| darkred    | <b>ppa002559m.g</b> | <b>Glycosyl hydrolase family protein</b>                    | <b>empty</b>                              | <b>3</b>  |
| darkred    | ppa004968m.g        | UDP-glucosyl transferase 85A2                               | AtUGT85A2,UGT85A2                         | 3         |
| darkred    | ppa016463m.g        | UDP-glucosyl transferase 74B1                               | UGT74B1                                   | 2         |
| darkred    | ppa001412m.g        | beta galactosidase 1                                        | $\beta$ -GAL1                             | 2         |
| darkred    | ppa004471m.g        | hexokinase-like 1                                           | AtHKL1,HKL1                               | 2         |
| darkred    | ppa019241m.g        | NAC transcription factor-like 9                             | NTL9                                      | 2         |
| darkred    | ppa024549m.g        | cell wall / vacuolar inhibitor of fructosidase 2            | ATC/VIF2,C/VIF2                           | 2         |
| darkred    | ppa010282m.g        | Nucleotide-diphospho-sugar transferases superfamily protein | empty                                     | 2         |
| darkred    | ppa026557m.g        | UDP-Glycosyltransferase superfamily protein                 | AtUGT85A1,UGT85A1                         | 1         |
| darkred    | ppa008448m.g        | Nucleotide-sugar transporter family protein                 | empty                                     | 1         |
| darkred    | ppa019354m.g        | UDP-glucosyl transferase 73B3                               | UGT73B3                                   | 1         |
| darkred    | ppa008266m.g        | Galactose oxidase/kelch repeat superfamily protein          | empty                                     | 1         |
| darkred    | ppa020191m.g        | UDP-Glycosyltransferase superfamily protein                 | GT72B1,UGT72B1                            | 1         |
| darkred    | <b>ppa002511m.g</b> | <b>Cellulose-synthase-like C4</b>                           | <b>AtCSLC04,ATCSLC4,CSLC04,CSLC4</b>      | <b>1</b>  |
| darkred    | ppa019715m.g        | Glycosyltransferase family 61 protein                       | empty                                     | 1         |
| yellow4    | <b>ppa017606m.g</b> | <b>sucrose synthase 6</b>                                   | <b>SuSy, SUS6</b>                         | <b>26</b> |
| yellow4    | ppa023079m.g        | O-Glycosyl hydrolases family 17 protein                     | empty                                     | 23        |
| yellow4    | ppa020393m.g        | Glycosyl hydrolase superfamily protein                      | empty                                     | 9         |
| yellow4    | ppa001135m.g        | sucrose synthase 5                                          | ATSUS5,SUS5                               | 7         |
| yellow4    | ppa004437m.g        | Plant invertase inhibitor superfamily                       | INVINH                                    | 5         |
| yellow4    | ppa004643m.g        | O-Glycosyl hydrolases family 17 protein                     | empty                                     | 4         |
| yellow4    | ppb017057m.g        | polyol/monosaccharide transporter 5                         | AtPLT5,AtPMT5,PMT5                        | 4         |
| yellow4    | ppa021570m.g        | Inositol 1,3,4-trisphosphate 5/6-kinase family protein      | empty                                     | 1         |
| lightpink4 | <b>ppa002334m.g</b> | <b>Vacuolar invertase</b>                                   | <b>VINV, AtBETAFRUCT4</b>                 | <b>11</b> |
| lightpink4 | ppa005977m.g        | Melibiose family protein                                    | empty                                     | 5         |

|               |                     |                                                 |                                      |           |
|---------------|---------------------|-------------------------------------------------|--------------------------------------|-----------|
| lightpink3    | <b>ppa011699m.g</b> | <b>Plant invertase inhibitor superfamily</b>    | <b>INVINH</b>                        | <b>20</b> |
| lightpink3    | ppa009417m.g        | xyloglucan endotransglycosylase 6               | XTH23,XTR6                           | 19        |
| lightpink3    | ppa004732m.g        | O-Glycosyl hydrolases family 17 protein         | empty                                | 18        |
| lightpink3    | ppa000910m.g        | phosphoenolpyruvate carboxylase 1               | AtPEPC1,ATPPC1,PEPC1,PPC1            | 18        |
| lightpink3    | ppa007628m.g        | Galactose mutarotase-like superfamily protein   | empty                                | 18        |
| lightpink3    | ppa005855m.g        | UDP-Glycosyltransferase superfamily protein     | empty                                | 15        |
| lightpink3    | ppa005150m.g        | 6-phosphogluconate dehydrogenase family protein | GPDHC1                               | 14        |
| lightpink3    | ppa010506m.g        | phosphomannomutase                              | AtPMM,PMM                            | 14        |
| lightpink3    | ppa025195m.g        | fructose-bisphosphate aldolase 2                | FBA2                                 | 7         |
| lightpink3    | ppa005641m.g        | O-Glycosyl hydrolases family 17 protein         | empty                                | 5         |
| lightpink3    | ppa004086m.g        | phosphofructokinase 5                           | PFK5                                 | 4         |
| lightpink3    | <b>ppa004956m.g</b> | <b>UDP-glucosyl transferase 85A2</b>            | <b>AtUGT85A2,UGT85A2</b>             | <b>4</b>  |
| lightpink3    | <b>ppa001889m.g</b> | <b>cellulose synthase-like B3</b>               | <b>ATCSLB03,ATCSLB3,CSLB03</b>       | <b>3</b>  |
| lightpink3    | ppa011560m.g        | Plant invertase inhibitor superfamily           | INVINH                               | 2         |
| lightpink3    | ppa007237m.g        | Nucleotide/sugar transporter family protein     | empty                                | 1         |
| lightpink3    | ppa004979m.g        | UDP-glucosyl transferase 85A2                   | AtUGT85A2,UGT85A2                    | 1         |
| lightpink3    | <b>ppa005294m.g</b> | <b>UDP-glucosyltransferase 74F2</b>             | <b>AtSAGT1,GT,SAGT1,SGT1,UGT74F2</b> | <b>1</b>  |
| thistle       | ppa019851m.g        | xylosyltransferase 1                            | ATXT1,XT1,XXT1                       | 5         |
| thistle       | ppa009346m.g        | xyloglucan endotransglycosylase 6               | XTH23,XTR6                           | 1         |
| darkseagreen2 | ppa007982m.g        | galactinol synthase 1                           | AtGoIS1,GoIS1                        | 3         |
| darkseagreen2 | ppa001301m.g        | trehalose-phosphatase/synthase 9                | ATTPS9,TPS9                          | 3         |
| darkseagreen2 | ppa002927m.g        | O-fucosyltransferase family protein             | empty                                | 1         |
| darkseagreen2 | ppa015829m.g        | pectin methylesterase inhibitor 1               | PME1                                 | 1         |
| darkseagreen3 | ppa006130m.g        | Pectin lyase-like superfamily protein           | empty                                | 3         |
| darkseagreen3 | ppa004719m.g        | cellulase 3                                     | ATCEL3,ATGH9B3,CEL3                  | 2         |
| darkseagreen3 | <b>ppa001730m.g</b> | <b>Raffinose synthase/ seed imbibition 2</b>    | <b>RS, AtSIP2,SIP2</b>               | <b>1</b>  |
| lightblue4    | ppa005846m.g        | Mannose-6-phosphate isomerase, type I           | MEE31,PMI1                           | 13        |
| lightblue4    | ppa006530m.g        | Galactosyltransferase family protein            | empty                                | 11        |
| lightblue4    | ppa008804m.g        | myo-inositol oxygenase 4                        | MIOX4                                | 10        |
| lightblue4    | ppa005142m.g        | O-Glycosyl hydrolases family 17 protein         | empty                                | 7         |
| lightblue4    | ppa007079m.g        | Glycosyl hydrolase superfamily protein          | empty                                | 2         |
| lightblue4    | ppa009365m.g        | xyloglucan endotransglucosylase/hydrolase 10    | XTH10                                | 1         |

|                 |                     |                                                                   |                         |           |
|-----------------|---------------------|-------------------------------------------------------------------|-------------------------|-----------|
| coral1          | <b>ppa001841m.g</b> | <b>Raffinose synthase/ seed imbibition 1</b>                      | <b>RS, AtSIP1,SIP1</b>  | <b>11</b> |
| coral1          | ppa007685m.g        | xyloglucan endotransglucosylase/hydrolase 30                      | XTH30,XTR4              | 8         |
| coral1          | ppa018204m.g        | cellulose synthase like E1                                        | ATCSLE1,CSLE1           | 2         |
| coral1          | <b>ppa005277m.g</b> | <b>UDP-glucosyl transferase 71B6</b>                              | <b>UGT71B6</b>          | <b>2</b>  |
| coral1          | ppa006453m.g        | monogalactosyldiacylglycerol synthase 2                           | AtMGD2,MGD2             | 1         |
| coral1          | <b>ppa003718m.g</b> | <b>beta glucosidase 15</b>                                        | <b>β-GLU15</b>          | <b>1</b>  |
| coral1          | <b>ppa007869m.g</b> | <b>UDP-glucosyl transferase 71C3</b>                              | <b>UGT71C3</b>          | <b>1</b>  |
| lightsteelblue1 | ppa005210m.g        | O-Glycosyl hydrolases family 17 protein                           | empty                   | 28        |
| lightsteelblue1 | ppa006612m.g        | Galactosyltransferase family protein                              | empty                   | 27        |
| lightsteelblue1 | ppa004287m.g        | glucosidase 1                                                     | GCS1,KNF                | 23        |
| lightsteelblue1 | ppa001363m.g        | beta-galactosidase 3                                              | β-GAL3                  | 23        |
| lightsteelblue1 | ppa007396m.g        | Glycosyl hydrolase family protein with chitinase insertion domain | empty                   | 23        |
| lightsteelblue1 | ppa004172m.g        | glycosyl hydrolase 9B8                                            | AtGH9B8,GH9B8           | 22        |
| lightsteelblue1 | ppa000209m.g        | Pyruvate phosphate dikinase, PEP/pyruvate binding domain          | GWD,GWD1,SEX1,SOP,SO P1 | 21        |
| lightsteelblue1 | ppa004534m.g        | O-Glycosyl hydrolases family 17 protein                           | empty                   | 16        |
| lightsteelblue1 | ppa020432m.g        | O-Glycosyl hydrolases family 17 protein                           | empty                   | 14        |
| lightsteelblue1 | ppa005206m.g        | O-Glycosyl hydrolases family 17 protein                           | empty                   | 13        |
| lightsteelblue1 | ppa027011m.g        | endoxyloglucan transferase A3                                     | AtXTH27,EXGT-A3,XTH27   | 11        |
| lightsteelblue1 | ppa011318m.g        | Plant invertase inhibitor superfamily                             | INVINH                  | 11        |
| lightsteelblue1 | ppa025159m.g        | glycosyl hydrolase 9B18                                           | AtGH9B18,GH9B18         | 10        |
| lightsteelblue1 | ppa005375m.g        | O-Glycosyl hydrolases family 17 protein                           | empty                   | 8         |
| lightsteelblue1 | ppa024083m.g        | UDP-glucosyl transferase 71D1                                     | UGT71D1                 | 8         |
| lightsteelblue1 | ppa009437m.g        | xyloglucan endotransglucosylase/hydrolase 32                      | XTH32                   | 5         |
| lightsteelblue1 | ppa004881m.g        | Pectin lyase-like superfamily protein                             | empty                   | 4         |
| lightsteelblue1 | ppa002370m.g        | O-fucosyltransferase family protein                               | empty                   | 2         |
| lightsteelblue1 | ppa005075m.g        | UDP-glucosyl transferase 88A1                                     | UGT88A1                 | 1         |
| paleovioltred1  | ppa000357m.g        | ketose-bisphosphate aldolase class-II family protein              | empty                   | 21        |
| paleovioltred1  | ppa015713m.g        | Xyloglucan endotransglucosylase/hydrolase family protein          | TCH4,XTH22              | 16        |
| paleovioltred1  | ppa004523m.g        | beta-glucosidase 45                                               | BGLU45                  | 14        |
| paleovioltred1  | ppa002571m.g        | Phosphofructokinase family protein                                | empty                   | 13        |
| paleovioltred1  | ppa011607m.g        | Plant invertase inhibitor superfamily                             | INVINH                  | 10        |
| paleovioltred1  | ppa011831m.g        | Plant invertase inhibitor superfamily                             | INVINH                  | 7         |
| paleovioltred1  | ppa006622m.g        | Galactosyl transferase GMA12/MNN10 family protein                 | empty                   | 3         |
| paleovioltred1  | ppa005112m.g        | UDP-Glycosyltransferase superfamily protein                       | empty                   | 2         |
| paleovioltred1  | ppa004218m.g        | cell wall invertase 4                                             | AtcwINV4,cwINV4         | 1         |

|               |              |                                      |                   |   |
|---------------|--------------|--------------------------------------|-------------------|---|
| paleovoltred1 | ppa009610m.g | xyloglucan endotransglycosylase 6    | XTH23,XTR6        | 1 |
| paleovoltred1 | ppa003518m.g | Phosphofructokinase family protein   | empty             | 1 |
| paleovoltred1 | ppa005043m.g | UDP-glucosyl transferase 85A2        | AtUGT85A2,UGT85A2 | 1 |
| chocolate4    | ppa002606m.g | Galactosyltransferase family protein | empty             | 4 |

**Fig. S3.** Relative gene expression levels of Sucrose metabolism-associated pathways. Relative gene expression levels of sucrose metabolism-associated pathways in (A) fruits and (B) leaves of Santa Rosa (SR; black bars) and Sweet Miriam (SM; white bars) throughout development (S2 (pit hardening)) and ripening (S3/S4 (mature), S4-I (commercial harvest), S4-II (fully-ripe)) stages on the tree. Values were calculated and normalized using the SAND protein-related trafficking protein (*MON*) as reference gene and are presented as means  $\pm$  SE (n=6). The data were analyzed using two-way ANOVA followed by Tukey's test. Different letters indicate significant differences ( $p < 0.05$ ). Sucrose phosphate synthase (*SPS*); Sucrose synthase (*SuSy*); cell wall invertase (*CWINV*); vacuolar invertase (*VINV*); cytosolic invertase (*CytINV*); Invertase inhibitor (*INVINH*).

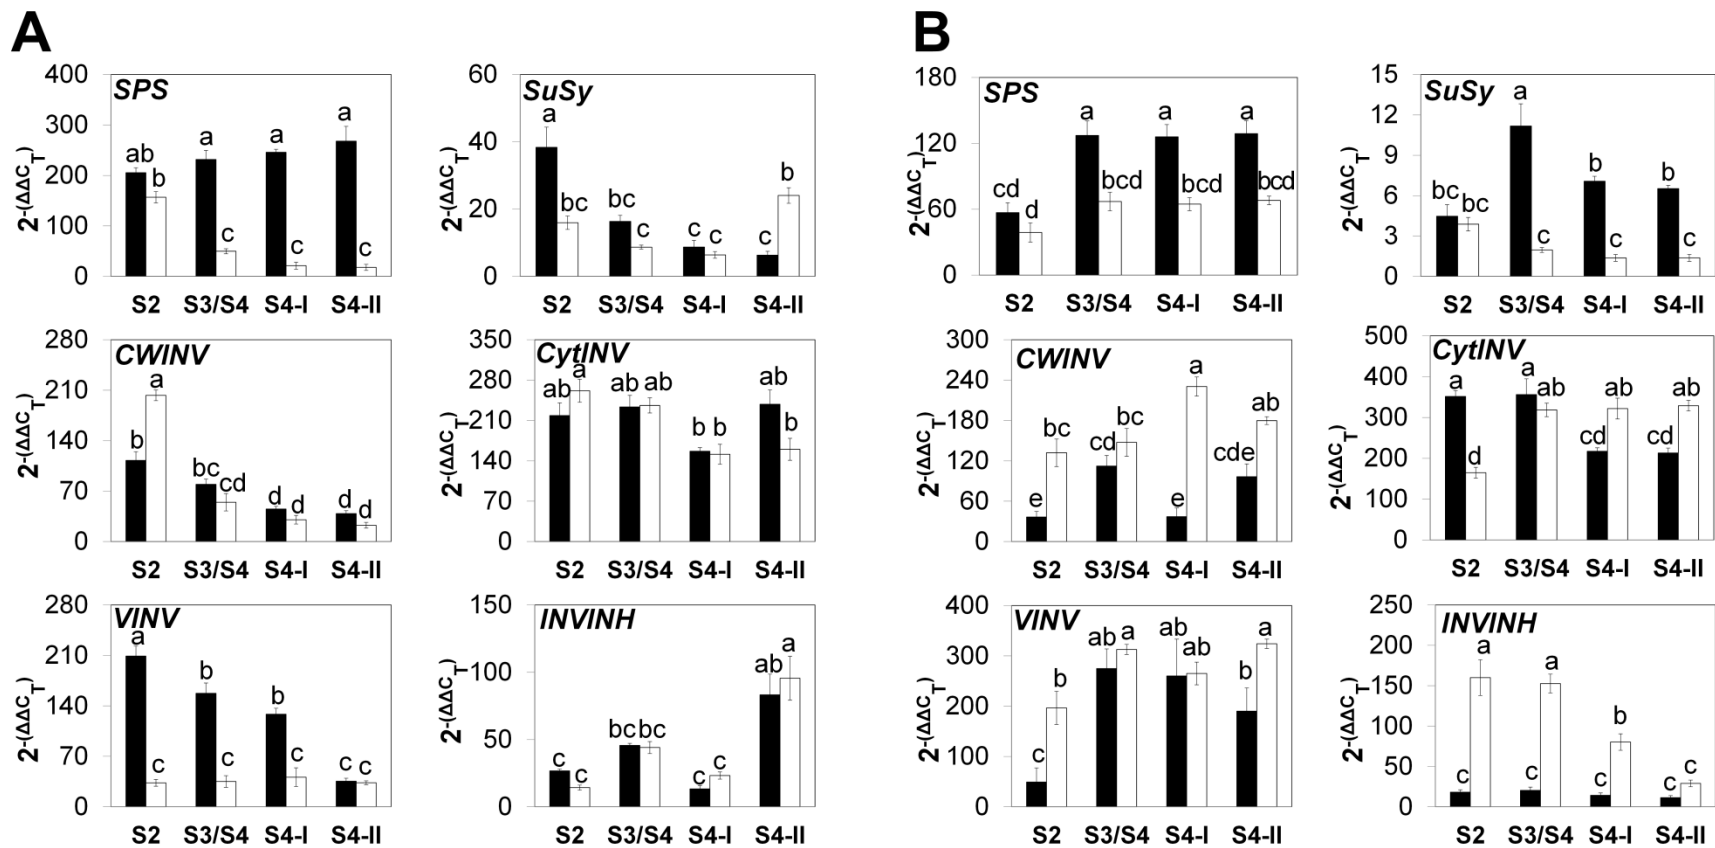

**Fig. S4.** Relative gene expression levels of Sorbitol metabolism-associated pathways. Relative gene expression levels of sorbitol metabolism-associated pathways in (A) fruits and (B) leaves of Santa Rosa (SR; black bars) and Sweet Miriam (SM; white bars) throughout development (S2 (pit hardening)) and ripening (S3/S4 (mature), S4-I (commercial harvest), S4-II (fully-ripe)) stages on the tree. Values were calculated and normalized using the SAND protein-related trafficking protein (*MON*) as reference gene and are presented as means  $\pm$  SE (n=6). The data were analyzed using two-way ANOVA followed by Tukey's test. Different letters indicate significant differences ( $p < 0.05$ ). Sorbitol-6-phosphate dehydrogenase (*S6PDH*);  $\text{NAD}^+$ -dependent sorbitol dehydrogenase (*NAD<sup>+</sup>-SDH*); hexokinase (*HK*).

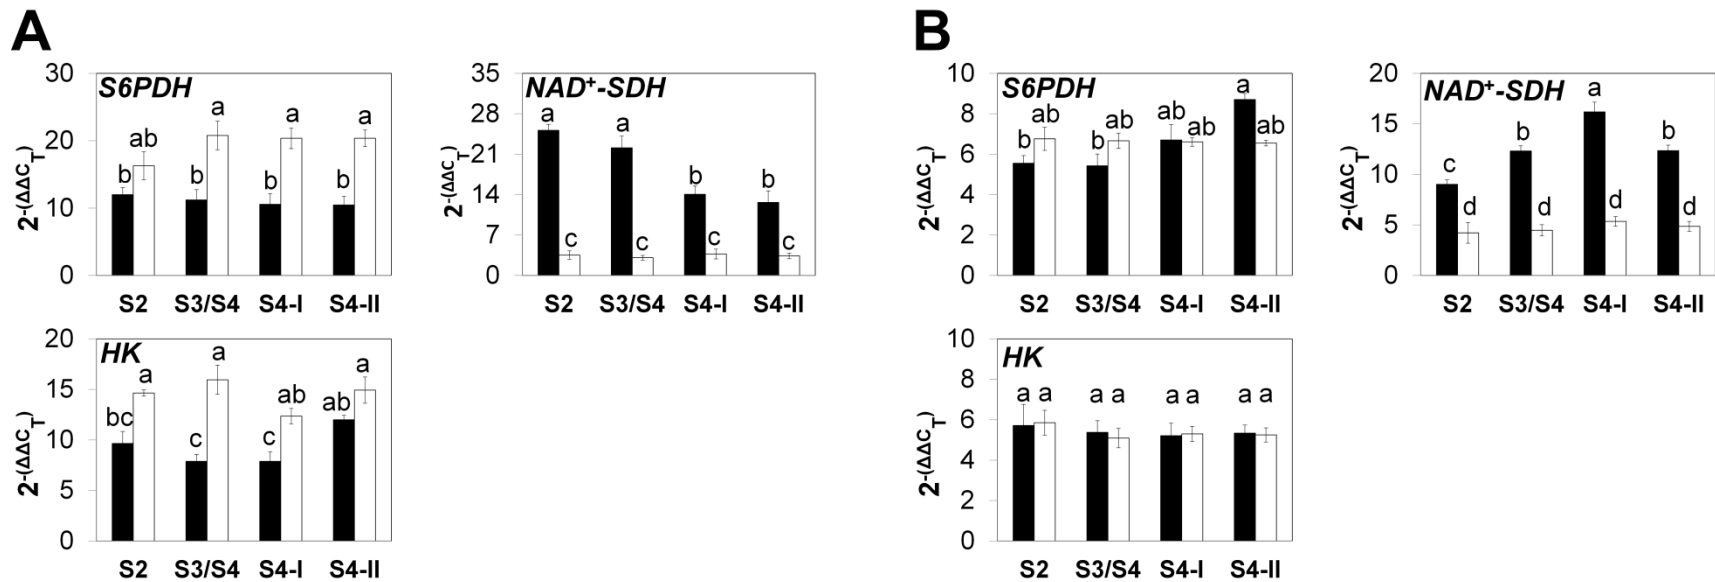

**Fig. S5.** Relative gene expression levels of minor sugar metabolism-associated pathways. Relative gene expression levels of galactose, galactinol, raffinose and trehalose metabolism-associated pathways in (A) fruits and (B) leaves of Santa Rosa (SR; black bars) and Sweet Miriam (SM; white bars) throughout development (S2 (pit hardening)) and ripening (S3/S4 (mature), S4-I (commercial harvest), S4-II (fully-ripe)) stages on the tree. Values were calculated and normalized using the SAND protein-related trafficking protein (*MON*) as reference gene and are presented as means  $\pm$  SE (n=6). The data were analyzed using two-way ANOVA followed by Tukey's test. Different letters indicate significant differences (p<0.05). Alpha-Galactosidase ( $\alpha$ -GAL); Beta-Galactosidase ( $\beta$ -GAL); Galatokinase (*GALK*); Galactinol synthase (*GoIS*); Raffinose synthase (*RS*); Trehalase (*TRE*).

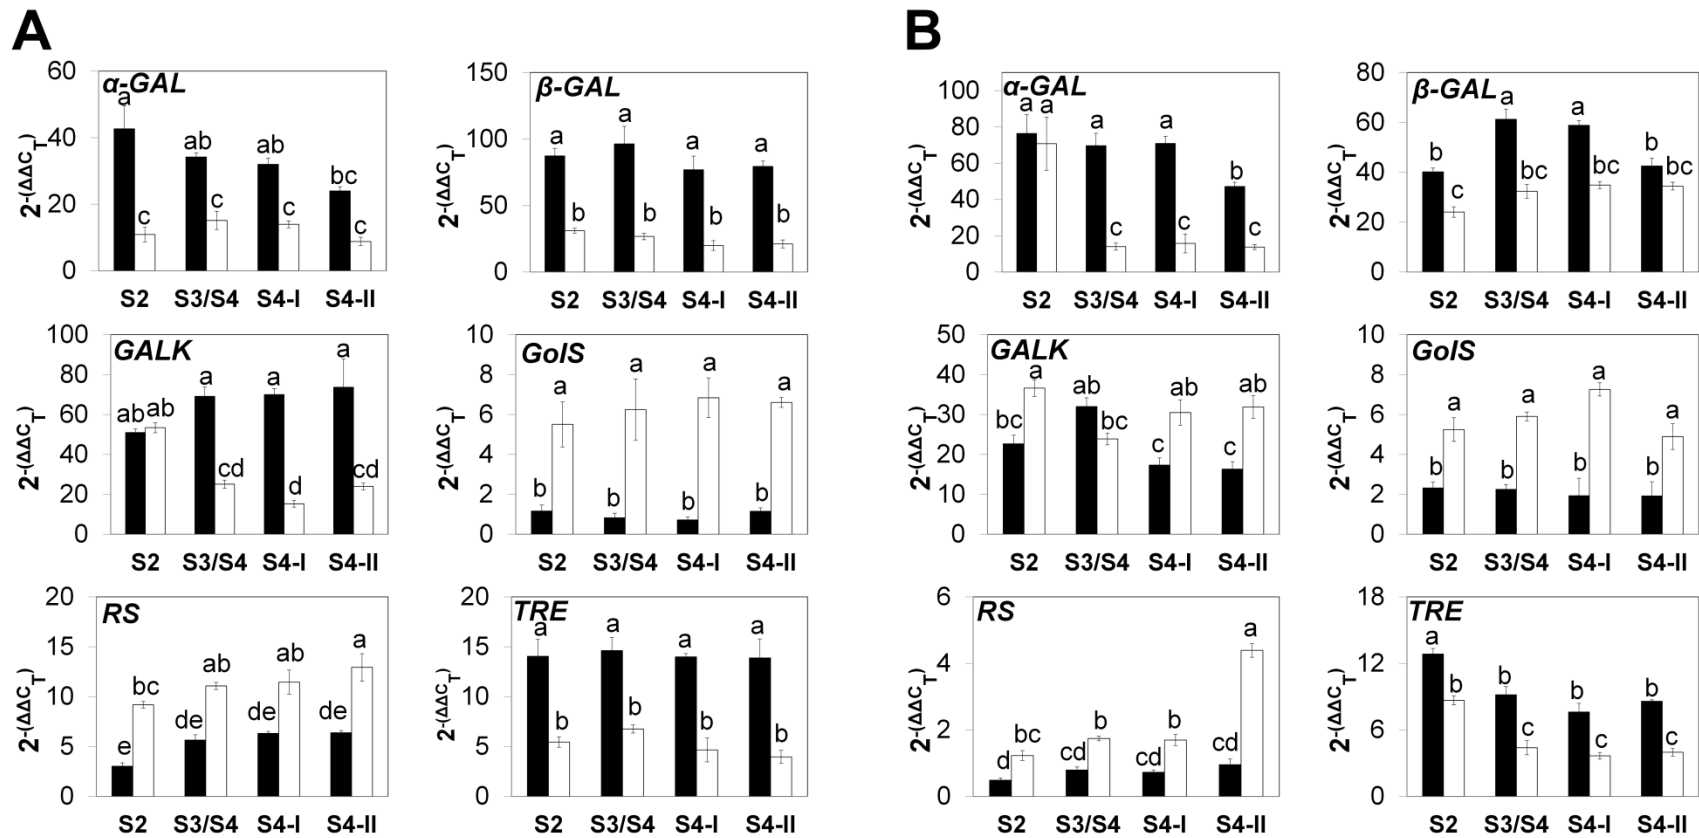

Supplement: erx391_suppl_supplementary_tables_s1_s2_figures_s3_s5.pdf [file erx391_suppl_supplementary_tables_s1_s2_figures_s3_s5.pdf]
